# Supplementary material for: Differential use of importin-α isoforms governs cell tropism and host adaptation of influenza virus
Source: PubMed Central journal article supplement — Nat Commun. 2011 Jan 18;2:156–. doi: 10.1038/ncomms1158 (PMC3105303; doi:10.1038/ncomms1158), 2011-01-18
Supplement: ncomms1158-s1.pdf [file ncomms1158-s1.pdf]

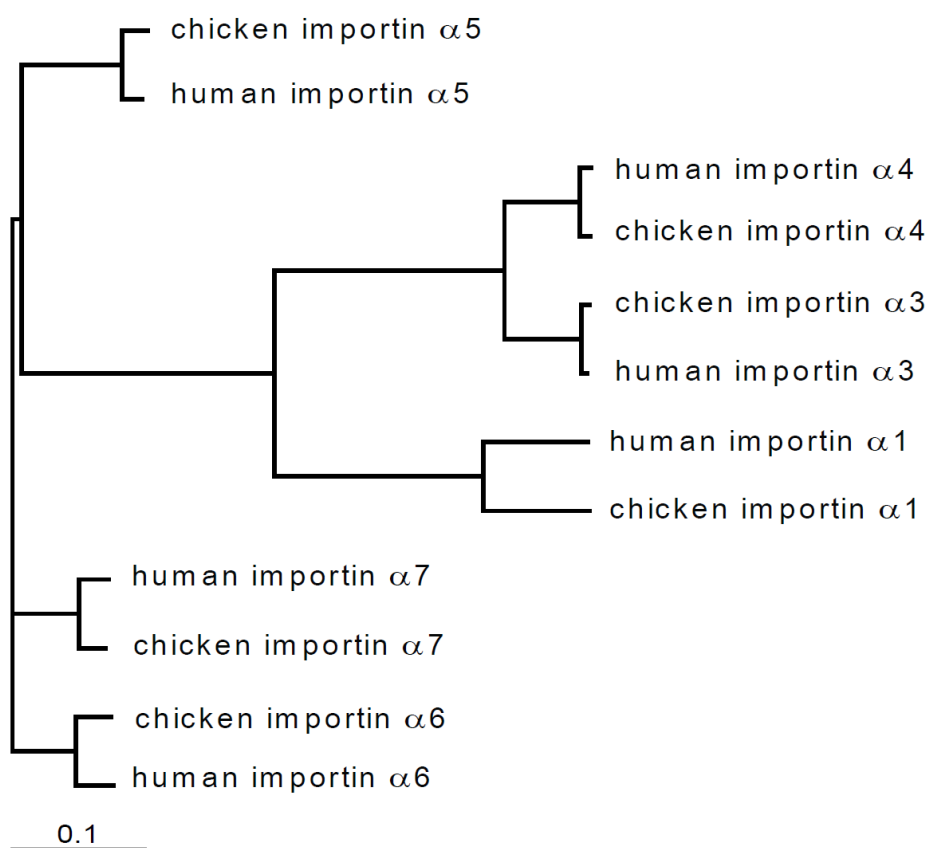

### Supplementary Figure S1

Phylogenetic analysis of human and chicken importins. Only five of six importins were studied because importin- $\alpha 6$  was shown to be testis-specific. Human and chicken importin protein sequences ( $\alpha 1$ ,  $\alpha 3$ ,  $\alpha 4$ ,  $\alpha 5$  and  $\alpha 7$ ) were aligned and phylogenetic trees calculated using ClustalX and TreeView.

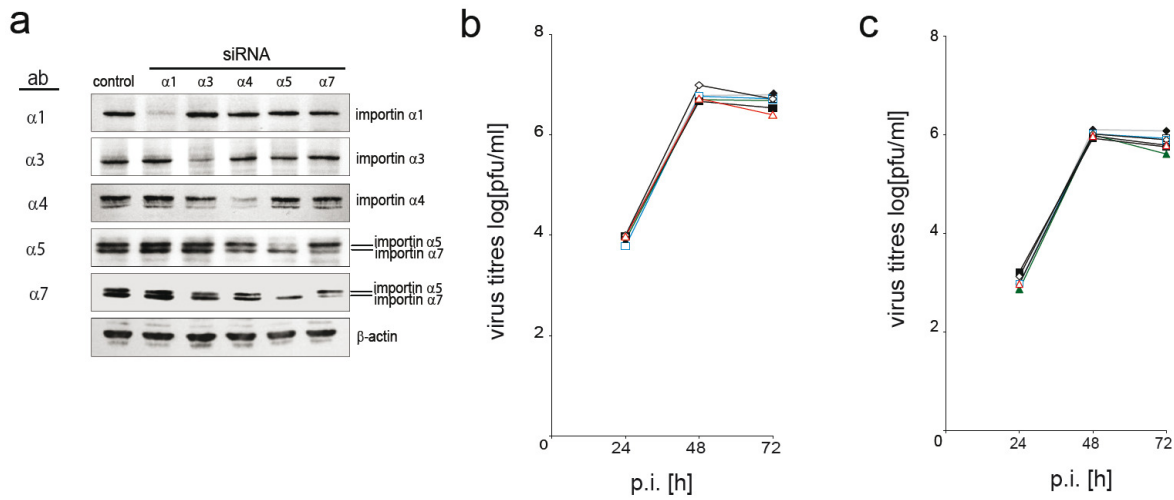

## Supplementary Figure S2

Growth curves of SC35 and SC35M viruses in importin silenced avian cells.

(a) Endogenous importins ( $\alpha 1$ -  $\alpha 7$ ) were silenced using siRNA in chicken fibroblasts (DF1). Importin- $\alpha 5$  antibody cross-reacts with importin- $\alpha 7$ . The doublet represents importin- $\alpha 5$  (upper band) and importin- $\alpha 7$  (lower band). Importin- $\alpha 7$  antibody also cross-reacts with importin- $\alpha 5$ . The doublet represents importin- $\alpha 5$  (upper band) and importin- $\alpha 7$  (lower band). (b) SC35 and (c) SC35M virus growth in importin silenced avian cells. Growth curves show controls (black, filled diamonds),  $\alpha 1$  (blue, squares),  $\alpha 3$  (green, filled triangles),  $\alpha 4$  (black, filled squares),  $\alpha 5$  (black diamonds) and  $\alpha 7$  (red triangles) silenced cells.

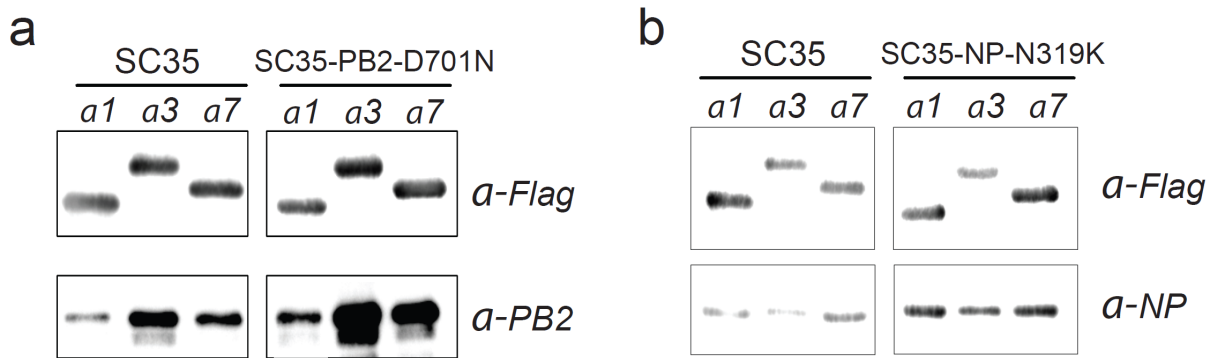

### Supplementary Figure S3

Interaction of PB2 and NP with importins.

(a) 293T cells were cotransfected with SC35-PB2 or SC35-PB2-D701N and Flag-tagged importin- $\alpha$ 1, - $\alpha$ 3 and - $\alpha$ 7 isoforms. Immunoprecipitation was performed using the Flag-tag. (b) 293T cells were cotransfected with SC35-NP or SC35-NP-N319K and Flag-tagged importin- $\alpha$ 1, - $\alpha$ 3 and - $\alpha$ 7 isoforms. Immunoprecipitation was performed using the Flag-tag.

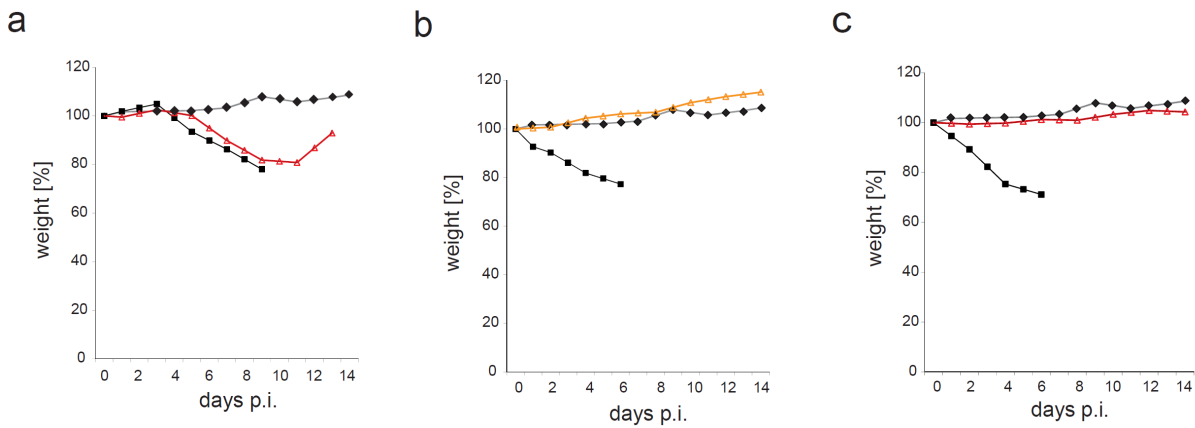

### Supplementary Figure S4

Weight loss of WT and importin-knockout animals infected with H5N1 and H1N1v isolates.

WT (black square;  $n=16$ ),  $\alpha 7^{-/-}$  (red triangle;  $n=16$ ) or  $\alpha 7^{\Delta IBB/\Delta IBB}$  (orange triangle;  $n=16$ ) animals were infected with 50-fold  $LD_{50}$  of (a) A/Thai/KAN-1/04 (H5N1), (b) 10-fold  $LD_{50}$  of A/Sachsen-Anhalt/101/09 (H1N1v) or (c) 100-fold  $LD_{50}$  of A/Hamburg/NY1580/09 (H1N1v). Control groups received PBS (black diamond). Weight loss was monitored for 14 days.

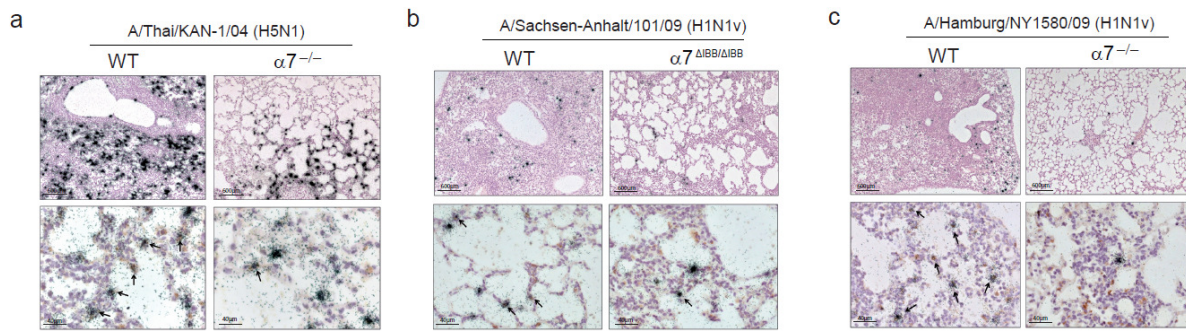

### Supplementary Figure S5

Cell tropism in the lung of H5N1 and H1N1v infected WT and importin-  $\alpha 7$ -knockout mice.

*In-situ* hybridization and double labeling experiments demonstrate virus spread (upper panels) and virus RNA positive Mac-3+ macrophages in lungs (lower panels) of WT and  $\alpha 7^{-/-}$  or  $\alpha 7^{\Delta IBB/\Delta IBB}$  mice 6d p.i. with (a) A/Thai/KAN-1/04 (H5N1), (b) A/Sachsen-Anhalt/101/09 (H1N1v) or (c) A/Hamburg/NY1580/09 (H1N1v). Arrows indicate viral RNA containing macrophages. Lungs of infected WT mice are highly infiltrated and alveolar structures destroyed. In contrast, infection in the lungs of importin- $\alpha 7$ -knockout mice is localized and alveolar structures largely intact.

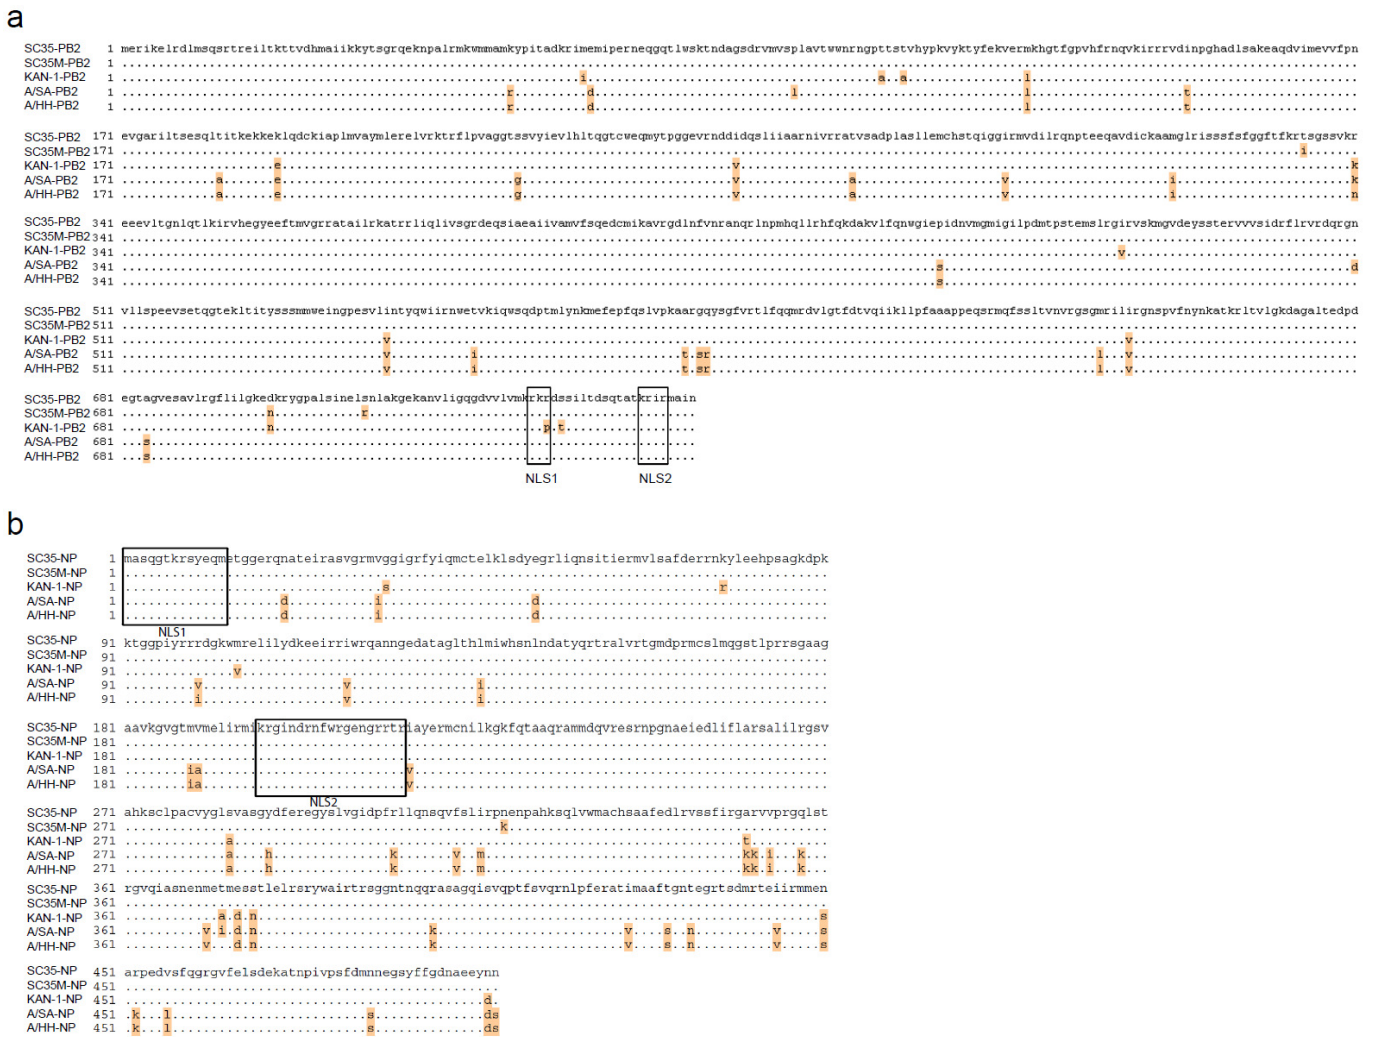

## Supplementary Figure S6

PB2 and NP amino acid sequence alignment.

(a) PB2 and (b) NP protein sequences of SC35 and SC35M (H7N7) (GenBank accession no. DQ266097; DQ266096), A/Thai/KAN-1/04 (H5N1) (here referred as KAN-1) (GenBank accession no. AY626149; AY626145), A/Sachsen-Anhalt/101/09 (H1N1v) (here referred as A/SA) (GenBank accession no. CY045479; CY045483) and A/Hamburg/NY1580/09 (here referred as A/HH) (GenBank accession no. GU480807; HM598305) (H1N1v) were aligned using Clone Manager Professional 9 and sequence differences compared to the consensus sequence are highlighted. The PB2 bipartite NLS sequence 736-RKRX<sub>12</sub>KRIR-755 as well as NP NLS sequences (1-13; NLS1) and (198-216) are highlighted.



| <b>targeted importin</b>     | <b>siRNA sequence</b>        |
|------------------------------|------------------------------|
| human importin- $\alpha$ 1   | GCA TGT GGC TAC TTA CGT A UU |
| human importin- $\alpha$ 3   | CAA CTT ATG TCG CCA CAA A UU |
| human importin- $\alpha$ 4   | ACA AGG AGG TAC CTA CAA T UU |
| human importin- $\alpha$ 5   | TGG AGT TCC TCA AAC GAA A UU |
| human importin- $\alpha$ 7   | AGA GCC TAG TCC TCC AAT A UU |
| chicken importin- $\alpha$ 1 | GGA TAG AAG TTG TTG TGA A UU |
| chicken importin- $\alpha$ 3 | GGT GAT AGA CTC CGG AAT A UU |
| chicken importin- $\alpha$ 4 | TGT AAT AGA TGC TGG GCT A UU |
| chicken importin- $\alpha$ 5 | GCA GAA GAC TTG TGG AAT T UU |
| chicken importin- $\alpha$ 7 | GGA CAG ATT TGT TGA GTT CUU  |

### **Supplementary Table S1**

siRNA sequences targeting chicken and human importin- $\alpha$ .
